# Supplementary material
Source: PubMed Central journal article supplement (PMC3318808)
Supplement: supp_78.8.2737_AEM7302-11_TableS1.pdf [file supp_78.8.2737_AEM7302-11_TableS1.pdf]

TABLE S1. LAB strains used for EPS screening

| Taxon                                          | No. of strains                                                                                                            | Origin                       | Reference       |
|------------------------------------------------|---------------------------------------------------------------------------------------------------------------------------|------------------------------|-----------------|
| <i>Leuc. pseudomesenteroides</i>               | 51B, 53B, 60, 63, 59A, 59B, 77A, 77B, 79A                                                                                 | Sourdough for sweet products | (4)             |
|                                                | 53C, 49, A78, LM210, LM264a, 229                                                                                          | Pizza dough                  | (3)             |
| <i>Leuc. mesenteroides</i>                     | 68B1                                                                                                                      | Sourdough for sweet products | (4)             |
|                                                | A27, A57, A6, A52                                                                                                         | Pizza dough                  | (2, 3, 6)       |
| <i>Leuc. lactis/garlicum</i>                   | 68B2, 68A12                                                                                                               | Sourdough for sweet products | (4)             |
| <i>Leuc. lactis</i>                            | 68A, 68B, 68B12, 69B, 95, 95A, 68A12                                                                                      | Sourdough for sweet products | (4)             |
| <i>Lc. lactis</i> subsp. <i>lactis</i>         | 49B1, 49B2, 79, 47B, 57B, 59B, 47B2                                                                                       | Sourdough for sweet products | (4)             |
| <i>Leuc. sp.</i>                               | 103 (1)                                                                                                                   | Sourdough for sweet products | (4)             |
|                                                | M47, LM204b, LA25, A23                                                                                                    | Pizza dough                  | (10)            |
| <i>Leuc. gelidum</i>                           | LM249, A16, A43, A25, A49, M39                                                                                            | Pizza dough                  | (1, 3, 6)       |
| <i>Leuc. oenos</i>                             | A4                                                                                                                        | Pizza dough                  | (3)             |
| <i>Leuc. amelibiosum</i>                       | A21, A65                                                                                                                  | Pizza dough                  | (3)             |
| <i>Leuc. dextranicum</i>                       | A28, A90, A7                                                                                                              | Pizza dough                  | (3)             |
| <i>Leuc. carnosus</i>                          | LA17, LM12                                                                                                                | Pizza dough                  | (3, 6)          |
| <i>Weis. paramesenteroides</i>                 | A269, A12, A51, A58, A64, A269                                                                                            | Pizza dough                  | (3)             |
|                                                | G14, G15, G18                                                                                                             | Commercial baker's yeast     | (3)             |
| <i>Weissella sp.</i>                           | A64 A58                                                                                                                   | Pizza dough                  | (3)             |
| <i>Lb. sp.</i>                                 | 56A1, 56B, 127, 108, 93                                                                                                   | Sourdough for sweet products | (4)             |
| <i>Lb. casei</i>                               | 42, 44A, 44B, A, A1, A12, B2, E, 33A, 39, 43                                                                              | Sourdough for sweet products | (4)             |
| <i>Lb. curvatus</i>                            | 69B2, 68A1, 68A2                                                                                                          | Sourdough for sweet products | (4)             |
|                                                | L5                                                                                                                        | Pizza dough                  |                 |
| <i>Lb. curvatus/sakei</i>                      | 64A                                                                                                                       | Sourdough for sweet products | (4)             |
| <i>Lb. curvatus</i> subsp. <i>curvatus</i>     | 116A                                                                                                                      | Sourdough for sweet products | (4)             |
| <i>Lb. coryniformis</i> subsp. <i>torquens</i> | 133, 109A                                                                                                                 | Sourdough for sweet products | (4)             |
| <i>Lb. sakei</i>                               | LM47, LM227, M77                                                                                                          | Pizza dough                  | (3)             |
|                                                | T56                                                                                                                       | Commercial baker's yeast     | (5, 6)          |
| <i>Lb. plantarum</i>                           | K22, K21, K13, K14, H19, H16, H5, H14, H22, H4, H7, H20, H9, H21, H17, H13, H10, H11, H12, H8, Q3, Q2, L4, L6, L3, L2, L8 | Sourdough for bread          | (1, 7)          |
|                                                | E5, E7, T34, T211, T231                                                                                                   | Commercial baker's yeast     | (3)             |
|                                                | DL6, AL5, CL9, CL5                                                                                                        | Pizza dough                  |                 |
| <i>Lb. paracasei</i>                           | EL7                                                                                                                       | Pizza dough                  | (3)             |
|                                                | E1                                                                                                                        | Commercial baker's yeast     | (3)             |
| <i>Lb. pentosus</i>                            | FL2                                                                                                                       | Pizza dough                  | (3)             |
|                                                | E4, E10, T238                                                                                                             | Commercial baker's yeast     | (6)             |
| <i>Lb. viridiscens</i>                         | LA18                                                                                                                      | Pizza dough                  | (3)             |
| <i>Lb. brevis</i>                              | H6, BL6, GL2, GL3                                                                                                         | Pizza dough                  | (3)             |
| <i>Lc. sp.</i>                                 | LA23, A19, M178, M230, LM197                                                                                              | Pizza dough                  | (3)             |
|                                                | T201, T40, T46, G17                                                                                                       | Commercial baker's yeast     | (6)             |
| <i>Lc. lactis</i> subsp. <i>lactis</i>         | 49B1, 49B2, 79, 47B, 47B, 59B1, 57B, 77, 59B, 47B2                                                                        | Pizza dough                  | (3)             |
| <i>Lc. lactis</i> subsp. <i>raffinolactis</i>  | E30                                                                                                                       | Commercial baker's yeast     | (3)             |
| <i>Lc. garviae</i>                             | LM66                                                                                                                      | Pizza dough                  | (3)             |
| <i>Lc. lactis</i>                              | LM10                                                                                                                      | Pizza dough                  | (3)             |
|                                                | T33                                                                                                                       | Commercial baker's yeast     | (3)             |
| Uncultured <i>Streptococcus sp.</i>            | 107                                                                                                                       | Sourdough for sweet products | (4)             |
| <i>E. faecium</i>                              | LA20, A86                                                                                                                 | Pizza dough                  | (1, 2, 3, 5, 6) |
| <i>E. faecalis</i>                             | TS57, NS11, NS10, OS17, ZS71, NS9, US69, OS14, ES5, PS23                                                                  | Pizza dough                  | (3)             |

## REFERENCES TABLE S1

- 1. Anastasio, M., O. Pepe, T. Cirillo, S. Palomba, G. Blaiotta, and F. Villani.** 2010. Selection and use of phytate-degrading LAB to improve cereal-based products by mineral solubilization during dough fermentation. *J. Food Sci.* **75**:M28-M35.
- 2. Coppola, S., O. Pepe, and G. Mauriello.** 1998. Effect of leavening microflora on pizza dough properties. *J. Appl. Microbiol.* **85**:891-897.
- 3. Coppola, S., O. Pepe, P. Masi, and M. Sepe.** 1996. Characterization of leavened doughs for Pizza in Naples. *Adv. Food Sci.* **18**:160-162.
- 4. Palomba S., G. Blaiotta, V. Ventorino, A. Saccone, and O. Pepe.** 2011. Microbial characterization of sourdough for sweet baked products in the Campania region (southern Italy) by a polyphasic approach. *Ann. Microbiol.* **61**:307-314.
- 5. Pepe, O., F. Villani, D. Oliviero, T. Greco, and S. Coppola.** 2003. Effect of proteolytic starter cultures as leavening agents for pizza dough. *Int J. Food Microb.* **84**:319-326.
- 6. Pepe, O., G. Blaiotta, G. Moschetti, T. Greco, and F. Villani.** 2003. Rope-producing strains of *Bacillus* spp. from wheat bread and strategy for their control by lactic acid bacteria. *Appl. Environ. Microbiol.* **69**:2321–2329.
- 7. Pepe, O., G. Blaiotta, M. Anastasio, G. Moschetti, D. Ercolini, and F. Villani.** 2004. Technological and molecular diversity of *Lactobacillus plantarum* strains isolated from naturally fermented sourdoughs. *Syst. Appl. Microbiol.* **27**:443-453.
