# Supplementary material
Source: PubMed Central journal article supplement (PMC3318808)
Supplement: supp_78.8.2737_AEM7302-11_TableS2.pdf [file supp_78.8.2737_AEM7302-11_TableS2.pdf]

1  
2  
3

4 TABLE S2. Nucleotide sequences of *epsD/E* gene of strains *Lb. curvatus* 69B2, *Leuc. lactis/garlicum* 68A12, *Leuc. mesenteroides* A57 and  
5 *Leuc. pseudomesenteroides* 63.

| Strain                              | Sequence                                                                                                                                                                                    | Closely relative<br>Sequence<br>(% of identity with<br>underlined sequence) |
|-------------------------------------|---------------------------------------------------------------------------------------------------------------------------------------------------------------------------------------------|-----------------------------------------------------------------------------|
| <i>Lb. curvatus</i> 69B2            | <u>TTCATTTTATTGGTAAAACCTCAAATTGAGGAGTTTCCACAGTT</u><br><u>TTGGAATATGTTAAGGGGAAATATGAGTTTAGTTGGGCCACGT</u><br><u>CCAATTGTAAGAGGAGAGTTAAAGAATAAGGGGAACAAGTCGA</u><br><u>TTTGTTTT</u> (139 bp) | DQ873503 (89%) <sup>1</sup>                                                 |
| <i>Leuc. lactis/garlicum</i> 68A12  | <u>TGATTTTATTTGTAAAACCTCAAATTGATGAGTTTCCACAATTT</u><br><u>TGGAATGTGCTAAAAGGCGATATGTCATTAGTTGGTCCTAGACC</u><br><u>AGCTCTGGAAGAGGAGTATGAAAAATATACTGAAACAGAAAAA</u><br>AAGCGTCTCAAG (143 bp)   | DQ873506 (79%) <sup>2</sup>                                                 |
| <i>Leuc. mesenteroides</i> A57      | <u>TCATTTTATTTGTAAAACCTCAAATTGATGAGTTTCCACAATTTTGG</u><br><u>AATGTGCTAAAAGGCGATATGTCATTAGTTGGTCCTAGACCAGCTC</u><br><u>TGGAAGAGGAGTATGAAAAATATACTGAAACAGAAAAAAGCGTC</u><br>TCAA (142 bp)     | DQ873506 (79%) <sup>2</sup>                                                 |
| <i>Leuc. pseudomesenteroides</i> 63 | <u>TCATTTTATTTGTAAAACCTCAAATTGATGAGTTTCCACAATTTT</u><br><u>GGAATGTGCTAAAAGGCGATATGTCATTAGTTGGTCCTAGACCA</u><br><u>GCTCTGGAAGAGGAGTATGAAAAATATACTGAAACAGAAAAA</u><br>AGCGTCTCAAGTCAAGCCAGTG  | DQ873506 (79%) <sup>2</sup>                                                 |

6 <sup>1</sup>*Leuconostoc citreum* strain 2.8 priming glycosyltransferase gene, partial cds.  
7 <sup>2</sup>*Pediococcus pentosaceus* strain CRL 777 priming glycosyltransferase gene, partial cds.  
8  
9
